# Supplementary material
Source: ML conference proceedings conference paper supplement (https://openreview.net/forum?id=Vj48eXaQDM)
Supplement: supplementary_material [file paper_with_appendix.pdf › nuerips8753/paper_with_appendix.pdf]

---

# Learned Prefix Caching for Efficient LLM Inference

---

Anonymous Author(s)

Affiliation

Address

email

## Abstract

Prefix caching is a key technique for reducing Large Language Model (LLM) inference costs. However, the prevalent least-recently-used (LRU) eviction algorithm has a large gap to the optimal algorithm. This paper introduces LPC, the first learned method to perform LLM prefix cache eviction. LPC leverages conversational content analysis to provide predictive guidance for eviction, determining which conversations are likely to continue. These insights, combined with last access timestamps, inform more effective cache management. Extensive evaluations across three real-world datasets demonstrate that LPC achieves 18–47% reductions in required cache sizes for equivalent hit ratios and has an 11% improvement in LLM prefilling throughput in an emulated environment.

## 1 Introduction

Prefix caching has been recently proposed as an optimization for reducing inference latency and compute cost in Large Language Model (LLM) serving systems [Gim et al., 2024, Gao et al., 2024]. By storing and reusing internal Key-Value (KV) states from previously processed input prefixes, prefix caches can avoid redundant computation during the expensive prefilling phase of inference, especially in multi-turn conversations where historical context is repeatedly reused. A cache hit on a long context can reduce Time-To-First-Token (TTFT) latency by 74% as shown in Section 4.5 and high hit ratio can significantly increase its server throughput.

Despite these benefits, the effectiveness of current prefix caching systems [Kwon et al., 2023, Zheng et al., 2024] is constrained by their least-recently-used (LRU) eviction strategy, which discards the least recently accessed KV blocks. Although simple and widely adopted, LRU’s performance is far from optimal for LLM prefix caching. As illustrated in Figure 1, there is a large gap between the hit ratios achieved by LRU and an idealized Oracle policy that possesses perfect knowledge of future conversation continuations.

The success of learned caching policies in other domains, such as Content Delivery Networks (CDNs), suggests that learned cache designs can significantly outperform LRU and other heuristics on hit ratios [Song et al., 2020, Yang et al., 2023, Song et al., 2023]. However, the fundamentally different nature of LLM workloads prevents a direct transplantation of these techniques. LLM prefix caches manage semantically interconnected, variable-length segments of conversational context, which are far more complex than the relatively independent, often fixed-size objects handled by traditional learned caches in other domains. This disparity necessitates the development of novel, specialized learned approaches tailored to the unique characteristics of LLM workloads.

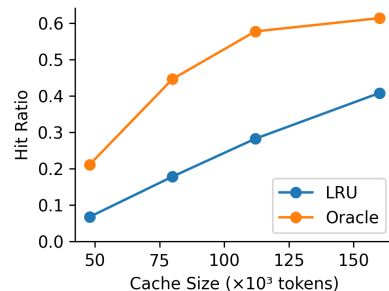

Figure 1: A substantial gap between the hit ratios achieved by LRU and an idealized Oracle policy with perfect knowledge of future conversation continuation (LMSys dataset).

To bridge this gap, we introduce LPC, a lightweight learned prefix caching framework specifically designed for LLM conversational systems. LPC addresses two primary challenges inherent in this domain. The first is to achieve substantially higher cache hit ratios over LRU-based approaches, by accurately predicting the likelihood of conversation continuation. The second is ensuring the learning component incurs negligible memory and computational overhead—a critical requirement for practical deployment within resource-constrained LLM serving environments—in order to deliver an overall lower inference latency and higher inference throughput.

Our contributions are as follows: (1) We propose the first learned prefix cache to leverage the opportunity to improve LLM inference efficiency by increasing prefix reuse. (2) We design a method to learn and predict conversation continuation probability with negligible memory and computational overhead. (3) Our evaluations of an implemented prototype system shows that LPC consistently outperforms LRU, achieving 18–47% reductions in the required cache size to achieve the same hit ratio. In an emulated disaggregated serving [Zhong et al., 2024] and reasoning [Snell et al., 2024] environment, this translates to LPC delivering up to 11% higher prefilling throughput and reducing the first token latency of up to 7% of requests by 42–75%.

## 2 Background

LLMs employ caching mechanisms to store internal representations of the input sequence, known as the KV cache and the prefix cache. This section describes the roles of the KV cache and the prefix cache in LLM inference, and presents the challenges in prefix cache eviction.

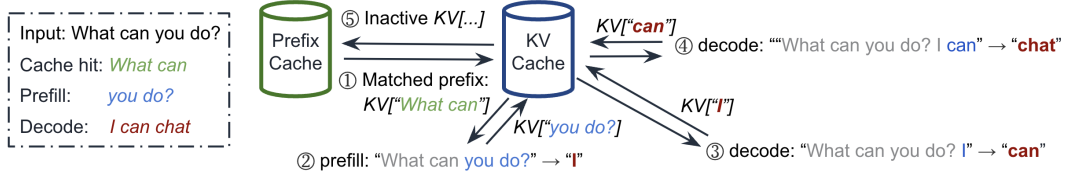

Figure 2: An example of the use of the KV cache and the prefix cache in LLM inference.

**KV cache for LLM inference.** The KV cache stores Key-Value (KV) states to support autoregressive LLM inference. These KV states are computed representations of the contextual information of each token. The KV cache is heavily used during the two phases of LLM inference. Initially, the *prefilling* phase processes the entire input prompt. For each token in this prompt, say  $token_i$ , its corresponding KV states,  $kv_i$ , are computed and stored in the KV cache. This phase concludes with the generation of the first output token. Subsequently, the *decoding* phase utilizes KV states in the KV cache for all previous tokens of this sequence, representing the full context seen so far, to generate the next token. For efficient memory management and to reduce fragmentation, the KV cache often organizes these states into fixed-size “KV blocks”, where the block size is typically around 16 tokens [Kwon et al., 2023]. Upon completion of a sequence, the KV states associated with that sequence are typically cleared from the KV cache. The primary role of this KV cache is thus to eliminate redundant computations for token contexts within an individual generation sequence.

**Prefix caching.** The standard KV cache typically discards KV states upon request completion. This prevents reuse across related requests, such as requests continuing a previous conversation, forcing costly re-prefilling of shared contexts. The *prefix cache* addresses this by retaining KV states from completed sequences. When a new request arrives, the system queries the prefix cache for the longest matching prefix, for example  $token_1, \dots, token_m$ , of the input. If its KV states ( $kv_1, \dots, kv_m$ ) are found, they are made available to the KV cache for the current request. Prefilling is then only required for the remaining, unmatched portion of the input, from  $token_{m+1}$  onwards, significantly reducing computation. An example is shown in Figure 2 where the prefilling of “What can” is skipped because it matches in the prefix cache.

**Prefix cache eviction.** The prefix cache has limited capacity as it uses precious GPU memory. When the prefix cache becomes full or the KV cache demands more memory, the system must evict existing KV blocks. The choice of which blocks to evict is crucial: a well-designed eviction policy

82 directly improves the prefix cache’s *hit ratio*—the fraction of future requests that find a matching  
 83 prefix—thereby reducing redundant computation and improving throughput and latency.

84 However, existing systems use the LRU policy, which evicts the least-recently used blocks. This  
 85 approach, while reasonably effective in traditional caching domains, falls short in LLM serving  
 86 environments. Prefix cache workloads exhibit different temporal and spatial locality patterns. In  
 87 human-LLM interactions, users naturally pause between turns to read, think, or compose follow-up  
 88 queries, meaning useful prefixes may go untouched for extended periods despite being highly relevant.  
 89 Furthermore, LRU fails to capture the semantic or task-related context of a conversation—factors  
 90 that are often more predictive of future reuse than recency alone. A conversation centered around a  
 91 complex, unresolved task is more likely to continue than one involving a brief, close-ended exchange.  
 92 These differences motivate us to design new eviction strategies that go beyond recency and account  
 93 for the unique behavioral and semantic patterns in LLM workloads.

### 94 3 Learned Prefix Caching

95 This section presents a learned prefix caching approach to significantly advance the state-of-the-art  
 96 in cache management for LLM inference. Our goal is to improve prefix cache effectiveness by  
 97 intelligently selecting which Key-Value (KV) blocks to evict when space is needed, thereby reducing  
 98 prefiling latency and increasing throughput. To achieve this, our method must satisfy three key  
 99 requirements:

- 100 • **High Hit Ratios:** The approach should consistently and substantially outperform the LRU  
 101 baseline in terms of cache hit rate across diverse workloads.
- 102 • **Improved Latency and Throughput:** The method must be efficient without introducing  
 103 bottlenecks, enabling both lower latency and higher throughput.
- 104 • **Minimal Overhead:** The system should impose negligible overhead in terms of GPU  
 105 memory usage and computational cost.

#### 106 3.1 Overview of the LPC Framework

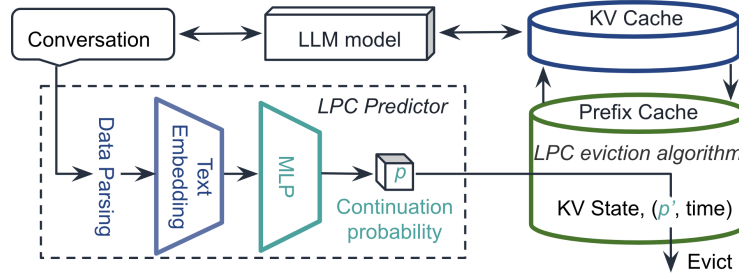

Figure 3: **Overview of LPC.** The LPC framework contains a predictor and an eviction algorithm.

107 We propose LPC, a learned prefix caching to meet the requirements above. Figure 3 illustrates the  
 108 design of LPC. The main different between this approach and a common prefix cache is that LPC  
 109 uses a predictor to inform the replacement algorithm about which blocks to evict, instead of picking  
 110 the least recently used ones.

111 The **LPC predictor** takes the conversation history and outputs a probability score indicating the  
 112 likelihood of the conversation continuing. Its steps are:

- 113 1. Data parsing: extract the user prompts from the conversation history.
- 114 2. Text embedding: generate a semantic embedding vector from the parsed user prompts.
- 115 3. MLP-based classification: feed the text embedding and other features into a Multilayer  
 116 Perceptron (MLP) classifier to predict the conversation continuation probability  $p$ .

117 The **LPC eviction algorithm** has two running components:

- 118 1. Cache Insertion and Eviction: insert KV blocks into a min-heap based on their updated  
 119 probabilities  $p'$ ; evict the KV block with the smallest  $p'$  when the prefix cache is full.

120        2. Probability Update: periodically apply a decay function to the predicted continuation  
121        probability  $p$  to get an updated probability  $p'$  that factors in the elapsed time.

### 122    3.2    LPC Predictor

123    This section describes the three components of the LPC predictor: data parsing, the text embedding  
124    model, and the MLP classifier.

125    **Data parsing.** To provide the model with sufficient context for accurate predictions, text and  
126    numerical features are extracted from the conversation. These include the text of the new user prompt  
127    and the user prompts of the preceding  $N$  conversational turns. Our implementation uses  $N = 4$  to  
128    keep much of contextual information available while keeping resource usage low. For similar reasons  
129    we do not include model responses because they contain less new information than user prompts.  
130    Additionally, the conversation length, represented as the number of turns already occurred, is included  
131    as a scalar feature, which is especially informative for conversations with more than  $N$  turns.

132    **Text embedding model.** For transforming raw text into meaningful vector representations, we  
133    utilize the `multilingual-e5-small` model [Wang et al., 2024] (with MIT license) from the family  
134    of sentence transformer models. We choose this model because it is capable of representing important  
135    patterns but is highly efficient. This model has 118M parameters. Such efficient models often have  
136    constraints on input length; for `multilingual-e5-small`, this is 512 tokens. A key challenge,  
137    therefore, is to compress the input exceeding the length limit while preserving essential information.  
138    We employ a strategic token allocation as follows: the 512-token budget is distributed evenly across  
139    each of the  $N+1$  user request turns. For each turn’s allocated token budget, half the tokens are sourced  
140    from the beginning of the prompt, and the other half from the end. This strategy is informed by  
141    research indicating that the most important information in textual input often lies in these extremities  
142    [Liu et al., 2023]. The output of the text embedding model is a vector with 384 dimensions.

143    **MLP-based classification Model.** The classification model is a 3-layer MLP, each layer with 128  
144    hidden neurons. We select it because it is very efficient while having sufficient capability to learn for  
145    our task. It accepts a concatenated feature vector as input, which consists of the 384-dimensional  
146    text embedding vector and a scalar value representing the number of conversation turns. The model  
147    outputs a single probability value, ranging from 0 to 1, indicating the confidence that the conversation  
148    will continue beyond the current turn.

149    We have made several design decisions to minimize the overhead of the predictor. First, we use small  
150    text embedding and MLP models that have low GPU memory overhead. Second, the predictor runs  
151    only once for each user request, where the request rate is typically lower than 10 per second per GPU.  
152    Third, the predictor is a stand-alone component **running in parallel** to LLM inference. Lastly, one  
153    predictor can pair with multiple LLM inference instances to further amortize the memory overhead  
154    and computational overhead through batching.

### 155    3.3    Training

156    This section outlines how LPC is trained, including training data collection, training configurations,  
157    and retraining.

158    **Training data.** Training and validation data are collected from a dedicated partition of conversations  
159    from the target dataset (as described in Section 4.2). This partition is strictly isolated and excluded  
160    from any datasets used for online evaluation. The size of the partition is half of the dataset. A separate  
161    model is trained for each dataset.

162    **Training configurations.** The training works as follows. First, during training, only the weights of  
163    the MLP classifier are updated; the pre-trained text embedding model is kept frozen. This partial fine-  
164    tuning method allows the MLP to adapt specifically to the continuation prediction task. Second, text  
165    embeddings for the training dataset are pre-computed and cached after the first epoch to significantly  
166    accelerate training. Subsequent epochs directly reuse these cached embeddings because the text  
167    embedding model is frozen, bypassing repeated computations and saving 90% of the training time.  
168    A binary cross-entropy loss function is employed. The loss is weighted with more weights for the

minority class to handle class imbalance. The optimizer is Adam with a learning rate of  $5 \times 10^{-4}$ . The training runs until convergence (within 20 epochs in our evaluation), and the checkpoint with the lowest loss on the validation dataset is saved for running online inference.

**Retraining.** The predictor is trained offline on historical data. To adapt to gradual shifts in user behavior or evolving conversational dynamics, periodic offline retraining can run daily in production. Training takes about 10 minutes making daily retraining affordable. Real-time online learning is currently not performed because the general patterns of conversation continuation in LLM applications are relatively stable over short to medium timescales, rendering continuous online retraining unnecessary due to its operational complexity.

### 3.4 Eviction Algorithm

This section introduces the LPC eviction algorithm in more detail. Our design largely follows the LRU prefix cache eviction algorithm but uses a dynamic conversation continuation probability instead of the last access time to rank objects.

#### 3.4.1 Data Structure and Operations.

The key data structure is a min-heap. Blocks in the heap are prioritized based on a dynamically calculated continuation probability of their associated conversation. The primary inputs associated with each sequence’s KV blocks are its initial predicted continuation probability and its last access timestamp.

The operations are:

- **Insertion:** When the decoding of a sequence completes, its KV blocks are removed from the KV cache and inserted into the prefix cache’s min-heap according to their initial predicted continuation probability.
- **Promotion:** If a prefix of an incoming user request matches a sequence of KV blocks in the prefix cache, these blocks are considered “hit.” They are then promoted to the KV cache and are consequently removed from the prefix cache’s min-heap.
- **Probability update:** The algorithm performs a periodic probability decay to be able to evict the KV blocks with over-estimated continuation probability. At configurable fixed intervals (defaulting to 10 seconds), LPC iterates through all KV blocks in the prefix cache. For each block, its associated continuation probability is re-evaluated using a decay function below. The min-heap is then reorganized to accurately reflect these updated probabilities.
- **Eviction:** When the prefix cache reaches its capacity, or when memory needs to be reclaimed (e.g., due to expansion of the KV cache), an eviction process is triggered. The KV block located at the root of the min-heap is selected and removed from the prefix cache.

#### 3.4.2 Probability Decay Function

To handle KV blocks with over-estimated continuation probability predictions from staying in the cache forever we periodically update their probabilities. We implement a decay function to adjust the conversation continuation probability as time elapses since its last interaction. This function’s input includes the initially predicted continuation probability ( $prob_{original}$ ), the current system time ( $time_{cur}$ ), and the timestamp of the last access to this KV block ( $time_{last}$ ). Its output is the current, time-adjusted probability ( $prob_{cur}$ ), which is calculated as:

$$prob_{cur} = \frac{prob_{original} \times decay}{prob_{original} \times decay + (1 - prob_{original})}$$

The *decay* factor itself is an exponential function of the elapsed time:

$$decay = \exp(-(time_{cur} - time_{last}) \times scale)$$

Here, *scale* is a hyperparameter controlling the decay rate, tuned empirically by observing typical conversation abandonment patterns in our workload data. This mechanism ensures that prefixes from inactive conversations receive progressively lower continuation probabilities, making them more likely eviction candidates.

## 4 Evaluation

To evaluate how well LPC meets its design goals, we focus on three evaluation questions:

- How much does LPC improve prefix cache hit ratios compared to LRU? (4.4, 4.3)
- To what extent does the higher hit ratio of LPC translate into improved throughput and reduced latency? (4.5)
- What are the memory and computational overheads introduced by LPC? (4.6)

### 4.1 Implementation and Evaluation Environments

We implement a prototype of LPC on top of the vLLM serving framework [Kwon et al., 2023], which is licensed under Apache-2.0. The conversation continuation predictor runs as an external component, while the cache eviction policy is integrated directly into the vLLM prefix cache. Unless otherwise specified, all vLLM arguments use their default values. The implementation is based on the main branch of vLLM as of March 10, 2025.

We allocate 1 GB of GPU memory for the predictor used in LPC. This allocation breaks down as follows: approximately 560 MB for PyTorch’s CUDA context and kernel initialization, 240 MB for loading the `multilingual-e5-small` model weights in float16 precision, and around 200 MB for runtime memory to store inputs and attention buffers.

All experiments were conducted on NVIDIA H100 GPUs, equipped with 80 GB of HBM3 memory. We use the Qwen3-32B-FP8 model [Qwen3 Team, 2025] to run inference. It is a 32-billion parameter reasoning model and is licensed with Apache 2.0. We use a single GPU to run the model. Considering the memory used by the model and pytorch, the memory available for KV cache and Prefix cache is 40 GB in total. The other hardware usage includes 8 CPUs and 64 GB CPU memory. The baseline is vLLM’s LRU cache eviction algorithm.

Our evaluations use the following metrics:

- **Hit Ratio:** The average prefix cache hit ratio across all requests.
- **Time-to-First-Token (TTFT):** The latency observed by the client from sending a request to receiving the first response token.
- **Throughput:** The average number of sequences prefilling per second.

To ensure a fair comparison with the LRU-based approach, **we deduct 1 GB from LPC’s prefix cache size in all evaluations**, to account for its GPU memory overhead.

### 4.2 Workload

We run prefix cache hit ratio comparisons on real-world conversational datasets. These include:

- LMSys: a large-scale collection of user-chatbot dialogues [Zheng et al., 2023a].
- ShareGPT: conversations with ChatGPT [ShareGPT Team, 2023].
- Chatbot-Arena: a platform where users compare various LLMs [Chiang et al., 2024].

LMSys has a limited use license. ShareGPT has a Apache-2.0 license. Chatbot-Arena has a CC license. Table 1 summarizes the statistics of the three datasets. The follow-up ratio is the percentage of requests that will receive a future request of the same conversation.

Table 1: Dataset Properties.

| Dataset       | Total conversations | Avg. input length | Avg. output length | Follow-up ratio |
|---------------|---------------------|-------------------|--------------------|-----------------|
| LMSys         | $1 \times 10^6$     | 63 tokens         | 179 tokens         | 35%             |
| ShareGPT      | $9.5 \times 10^4$   | 113 tokens        | 305 tokens         | 55%             |
| Chatbot-Arena | $3.3 \times 10^4$   | 36 tokens         | 155 tokens         | 8%              |

244 An important limitation of public datasets is the lack of timestamp information, making it difficult  
 245 to evaluate LLM systems under realistic conversational workloads. Simple Poisson-based arrival  
 246 models are insufficient: they ignore LLM generation times—potentially placing a user request before  
 247 the previous response finishes—and do not account for conversation start times.

248 To overcome this limitation, we introduce a two-phase strategy that separates user think time modeling  
 249 from LLM response times and schedules conversation start times to simulate realistic server load.  
 250 In the pre-run phase, chat intervals within each conversation are sampled from an exponential  
 251 distribution with mean  $\lambda_{\text{chat}}$ , and conversation start times are spaced to keep the number of concurrent  
 252 active conversations below a target threshold  $N_{\text{conv}}$  (default 200), emulating a static load balancer.

253 In the runtime phase, each conversation starts at its assigned time, and subsequent requests occur  
 254 after adding the sampled user interval to the actual completion time of the previous LLM response.  
 255 Evaluations run for 20 minutes to avoid capturing the cool-down period at the end of the trace.

### 256 4.3 Hit Ratios Across Varying Cache Sizes

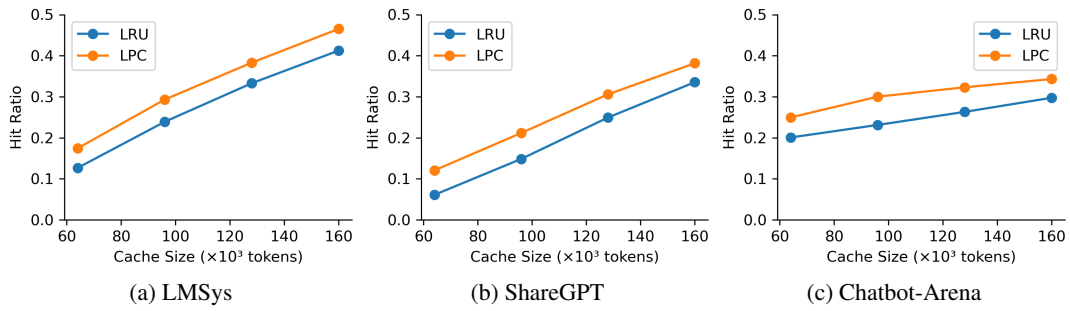

Figure 4: Hit ratio vs. cache size. LPC achieves consistently higher hit ratios than LRU, which translates to 18–47% reductions in the required cache size to achieve the same hit ratio as LRU.

257 To understand how LPC performs under different memory budgets, we compare its prefix cache hit  
 258 ratio with LRU’s while varying total token capacity. We vary the combined size of the prefix and KV  
 259 caches from 60K to 160K tokens (approximately 15.6 GB to 40 GB). They are allocated across the  
 260 prefix and KV caches dynamically by vLLM. The chat interval parameter  $\lambda_{\text{chat}}$  is fixed at 100.

261 Figure 4 shows that LPC consistently outperforms LRU across all datasets and cache sizes. The  
 262 improvement relative to LRU is 13% to 38% on LMSys (Figure 4a), 14% to 98% on ShareGPT  
 263 (Figure 4b), and 15% to 30% on Chatbot-Arena (Figure 4c).

264 To achieve the same hit ratio as LRU, LPC requires significantly less memory across all three datasets.  
 265 For example, on Chatbot-Arena, LPC reaches a 30% hit ratio with only 85 K tokens—just 57% of the  
 266 150 K tokens required by LRU. Similar memory savings are observed on LMSys (up to 18% less) and  
 267 ShareGPT (up to 30% less). This is a 7.2–18.8 GB GPU memory saving for a 40 GB cache. These  
 268 results show LPC substantially improves memory efficiency in prefix caching.

### 269 4.4 Impact of Chat Intervals on Hit Ratio

270 To evaluate the robustness of LPC under varying user interaction patterns, we fix the cache size to  
 271 40 GB (the full available GPU memory) and vary the chat interval parameter  $\lambda_{\text{chat}}$  to simulate different  
 272 user think times. Shorter intervals represent more frequent user interactions, which may increase  
 273 cache contention, while longer intervals simulate slower-paced conversations, with potentially higher  
 274 reuse of cached prefixes.

275 As shown in Figure 5, LPC consistently outperforms LRU across all datasets and interval settings,  
 276 achieving 5% to 18% higher hit ratios. Specifically, improvements range from 5% to 18% on LMSys  
 277 (Figure 5a), 11% to 15% on ShareGPT (Figure 5b), and 7% to 16% on Chatbot-Arena (Figure 5c).  
 278 These results show that LPC maintains strong performance across diverse conversational workloads,  
 279 adapting well to varying user behaviors.

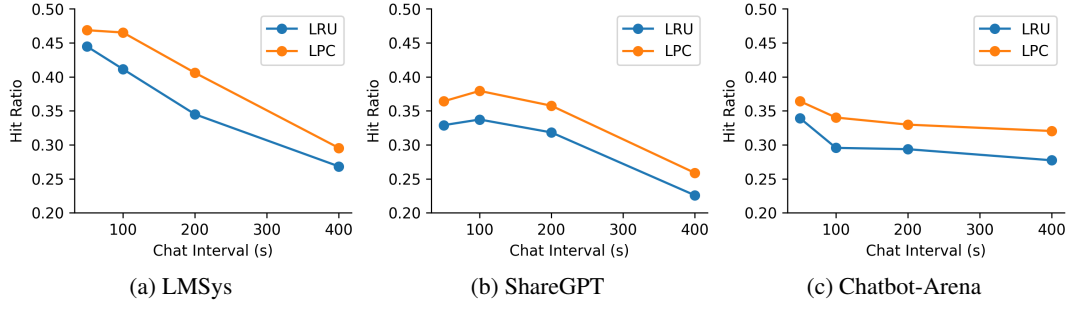

Figure 5: Hit ratio vs. chat intervals. LPC has consistently higher hit ratio than LRU, with 5–18% relative improvements.

#### 4.5 Throughput and Latency

To evaluate the impact on throughput and latency by the improved hit ratios, we use a microbenchmark that emulates a prefiling-only server in a disaggregated inference framework. This method is widely used in industry and is becoming a next-generation standard [Zhong et al., 2024, Patel et al., 2024, Hu et al., 2024, Qin et al., 2025].

We use a synthetic workload with longer context lengths to reflect the recent trend of test-time scaling related to the wide adoption of reasoning models [Snell et al., 2024, Chen et al., 2025]. Recent studies show that the generation length significantly increases from around 10 tokens generated by non-reasoning models to around 1,000 tokens generated by reasoning models [Han et al., 2024, Sun et al., 2025]. This increase in the generation lengths means an increase in the lengths of the matched contexts, because generated text is part of the context of the input of the next conversation round.

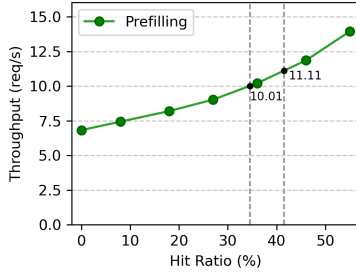

Figure 6: Prefilling throughput (req/s) as a function of hit ratio.

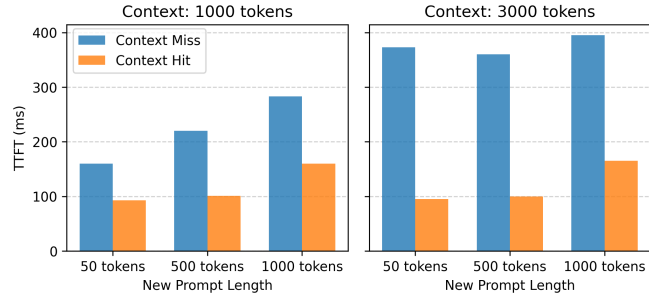

Figure 7: Time To First Token (TTFT) comparison for context cache miss vs. hit across varying context and prompt lengths.

Figure 6 shows the prefiling throughput gain as the hit ratio improves. In this microbenchmark, every input has a 1000-tokens context and a 50-token new prompt. The x-axis is the prefix cache hit ratio of the full contexts, including the new prompts that always miss. A hit ratio boost from 35 percent to 42 percent, which LPC achieves in Figure 5a, leads to an increase in throughput from 10.01 req/s to 11.11 req/s, indicating an 11.10% relative higher prefiling throughput in the emulated environment.

Figure 7 quantifies the reduction in TTFT achieved by a context cache hit. It shows that a context hit can keep the TTFT low regardless of the context length, which reduces TTFT by up to 73% compared to a context miss. It also shows that the TTFT of a hit barely increases when the new prompt length is smaller than 500, emphasizing the advantage of a context hit. These results indicate that a 7 percent hit ratio increase can translate to 7% of requests seeing their TTFT reduced by 42–75% in the emulated environment.

#### 4.6 Memory and Computational Overhead

We reserved 1 GB of GPU memory for LPC’s predictor and deduct 1 GB from LPC’s prefix cache as described in Section 4.1. In this case, LPC takes about 1.25% of the GPU memory running our



evaluations. A sensitivity study analyzing the impact of using varying memory for LPC is provided in the appendix.

The GPU computational overhead of LPC is minimal due to the high efficiency of the predictor model, which can process up to 1,000 predictions per second per GPU. A detailed instrumentation is also presented in the appendix.

## 5 Related Work

**Prefix Caching and Eviction Policies.** Many works have explored optimizing LLM inference with prefix caching, but none have placed an emphasis on how eviction policies adjust to the LLM workloads. PromptCache [Gim et al., 2024] reuses common prompt segments with precomputed attention states. RAGCache [Jin et al., 2024] proposes prefix-aware Greedy Dual-Size Frequency eviction policy for RAG but not for conversational workload. CacheBlend [Yao et al., 2025] uses prefix cache and cross SGLang [Zheng et al., 2024] builds RadixAttention to cache KV sequences in a radix-tree for efficient prefix matching, while vLLM [Kwon et al., 2023] maps logical KV blocks to a global physical cache. Both adopt a least-recently used (LRU) eviction strategy. Dynamo [NVIDIA Research Team, 2025] uses first-in-first-out (FIFO) eviction, while CachedAttention [Gao et al., 2024] presents a scheduler-aware eviction scheme based the queue of incoming requests for offline batched inference. Marconi [Pan et al., 2025] factors in computational savings for LRU eviction, but the approach is tailored to state-space models and does not extend to transformer architectures.

**ML-based Caching Algorithms.** Existing caching research explores machine learning as an approximate to optimal eviction decisions. LeCaR [Vietri et al., 2018] and CACHEUS [Rodriguez et al., 2021] apply online learning and expert-ensemble frameworks to further learn cache eviction policies. LRB [Song et al., 2020], MAT [Yang et al., 2023], and HALP [Song et al., 2023] leveraging machine learning in content delivery networks, demonstrates a 10% to 20% hit ratio improvement and cost saving over the best heuristic algorithm and LRU. However, these algorithms cannot be directly applied to LLM prefix caches due to the large difference in their caching paradigms.

**Learned Optimizations for LLM Inference.** Recent LLM inference systems use learned approaches to improve performance. [Zheng et al., 2023b] adds instructions for predicting prompt length in order to group requests with similar latencies, leading to a throughput increase compared to regular batched inference. Fu et al. [2024] and Qiu et al. [2024a,b] train smaller separate models to predict output length, finding that shortest-job-first batching reduces per-token latency significantly compared to first-come-first-serve. Finally, Jain et al. [2025] explores a heuristic-guided reinforcement learning-based router for workload-aware scheduling. Our work on LPC complement this work by focusing its learned optimizations on a different component of LLM inference: prefix caching.

## 6 Conclusion and Future Work

This paper presents the first learned prefix cache LPC to improve LLM inference efficiency. It uses ML on history data to predict conversation continuation probability to improve the cache hit ratio over LRU based approach.

Our evaluations show that LPC consistently outperforms the baseline in all three workloads, achieving up to 43% lower cache size utilization. The improved high-ratios translate to substantially lower latency and an 11% prefilling throughput increase. This is a step towards intelligent and adaptive memory management in LLM serving systems.

While our approach demonstrates significant improvements over LRU, this study has several limitations that we plan to address in future work. First, our evaluation relies on workloads augmented with synthetic timestamps due to the lack of public datasets with real interaction timing, which may not fully capture real-world user behavior. Second, our comparison is primarily against the LRU policy; evaluating against a broader range of heuristic eviction strategies (e.g., LFU, size-aware, or semantic-aware policies) would offer a more comprehensive view. Finally, we explored a single lightweight prediction model; examining alternative architectures or ensemble methods could further improve prediction accuracy and caching performance. These directions represent promising next steps for advancing learned prefix caching in LLM serving systems.

## References

- Qiguang Chen, Libo Qin, Jinhao Liu, Dengyun Peng, Jiannan Guan, Peng Wang, Mengkang Hu, Yuhang Zhou, Te Gao, and Wanxiang Che. Towards reasoning era: A survey of long chain-of-thought for reasoning large language models. *arXiv preprint arXiv:2503.09567*, 2025.
- Wei-Lin Chiang, Lianmin Zheng, Ying Sheng, Anastasios Nikolas Angelopoulos, Tianle Li, Dacheng Li, Banghua Zhu, Hao Zhang, Michael Jordan, Joseph E Gonzalez, et al. Chatbot arena: An open platform for evaluating llms by human preference. In *Forty-first International Conference on Machine Learning*, 2024.
- Yichao Fu, Siqi Zhu, Runlong Su, Aurick Qiao, Ion Stoica, and Hao Zhang. Efficient llm scheduling by learning to rank, 2024. URL <https://arxiv.org/abs/2408.15792>.
- Bin Gao, Zhuomin He, Puru Sharma, Qingxuan Kang, Djordje Jevdjic, Junbo Deng, Xingkun Yang, Zhou Yu, and Pengfei Zuo. Cost-efficient large language model serving for multi-turn conversations with cachedattention. In *Proceedings of the 2024 USENIX Annual Technical Conference (USENIX ATC 24)*, pages 111–126. USENIX Association, 2024.
- In Gim, Guojun Chen, Seung-seob Lee, Nikhil Sarda, Anurag Khandelwal, and Lin Zhong. Prompt cache: Modular attention reuse for low-latency inference. *Proceedings of Machine Learning and Systems*, 6:325–338, 2024.
- Tingxu Han, Zhenting Wang, Chunrong Fang, Shiyu Zhao, Shiqing Ma, and Zhenyu Chen. Token-budget-aware llm reasoning. *arXiv preprint arXiv:2412.18547*, 2024.
- Cunchen Hu, Heyang Huang, Junhao Hu, Jiang Xu, Xusheng Chen, Tao Xie, Chenxi Wang, Sa Wang, Yungang Bao, Ninghui Sun, et al. Memserve: Context caching for disaggregated llm serving with elastic memory pool. *arXiv preprint arXiv:2406.17565*, 2024.
- Kunal Jain, Anjaly Parayil, Ankur Mallick, Esha Choukse, Xiaoting Qin, Jue Zhang, Íñigo Goiri, Rujia Wang, Chetan Bansal, Victor Rühle, Anoop Kulkarni, Steve Kofsky, and Saravan Rajmohan. Intelligent router for llm workloads: Improving performance through workload-aware load balancing, 2025. URL <https://arxiv.org/abs/2408.13510>.
- Chao Jin, Zili Zhang, Xuanlin Jiang, Fangyue Liu, Xin Liu, Xuanzhe Liu, and Xin Jin. Ragcache: Efficient knowledge caching for retrieval-augmented generation. *arXiv preprint arXiv:2404.12457*, 2024.
- Woosuk Kwon, Zhuohan Li, Siyuan Zhuang, Ying Sheng, Lianmin Zheng, Cody Hao Yu, Joseph Gonzalez, Hao Zhang, and Ion Stoica. Efficient memory management for large language model serving with pagedattention. In *Proceedings of the 29th ACM Symposium on Operating Systems Principles (SOSP)*, pages 611–626, 2023.
- Nelson F Liu, Kevin Lin, John Hewitt, Ashwin Paranjape, Michele Bevilacqua, Fabio Petroni, and Percy Liang. Lost in the middle: How language models use long contexts. *arXiv preprint arXiv:2307.03172*, 2023.
- NVIDIA Research Team. Nvidia dynamo. <https://github.com/ai-dynamo/dynamo>, 2025. Accessed: 2025-05-12.
- Rui Pan, Zhuang Wang, Zhen Jia, Can Karakus, Luca Zancato, Tri Dao, Yida Wang, and Ravi Netravali. Marconi: Prefix caching for the era of hybrid llms. In *Proceedings of the 7th Conference on Machine Learning and Systems (MLSys 2025)*, 2025.
- Pratyush Patel, Esha Choukse, Chaojie Zhang, Aashaka Shah, Íñigo Goiri, Saeed Maleki, and Ricardo Bianchini. Splitwise: Efficient generative llm inference using phase splitting. In *2024 ACM/IEEE 51st Annual International Symposium on Computer Architecture (ISCA)*, pages 118–132. IEEE, 2024.
- Ruoyu Qin, Zheming Li, Weiran He, Jiale Cui, Feng Ren, Mingxing Zhang, Yongwei Wu, Weimin Zheng, and Xinran Xu. Mooncake: Trading more storage for less computation—a {KVCache-centric} architecture for serving {LLM} chatbot. In *23rd USENIX Conference on File and Storage Technologies (FAST 25)*, pages 155–170, 2025.

404 Haoran Qiu, Weichao Mao, Archit Patke, Shengkun Cui, Saurabh Jha, Chen Wang, Hubertus Franke,  
405 Zbigniew Kalbarczyk, Tamer Başar, and Ravishankar K. Iyer. Power-aware deep learning model  
406 serving with -Serve. In *2024 USENIX Annual Technical Conference (USENIX ATC 24)*, pages  
407 75–93, Santa Clara, CA, July 2024a. USENIX Association. ISBN 978-1-939133-41-0. URL  
408 <https://www.usenix.org/conference/atc24/presentation/qiu>.

409 Haoran Qiu, Weichao Mao, Archit Patke, Shengkun Cui, Saurabh Jha, Chen Wang, Hubertus Franke,  
410 Zbigniew T. Kalbarczyk, Tamer Başar, and Ravishankar K. Iyer. Efficient interactive llm serving  
411 with proxy model-based sequence length prediction, 2024b. URL [https://arxiv.org/abs/](https://arxiv.org/abs/2404.08509)  
412 2404.08509.

413 Qwen3 Team. Qwen3, 2025. URL <https://github.com/QwenLM/Qwen3>. Accessed: 2025-05-12.

414 Liana V Rodriguez, Farzana Yusuf, Steven Lyons, Eysler Paz, Raju Rangaswami, Jason Liu, Ming  
415 Zhao, and Giri Narasimhan. Learning cache replacement with {CACHEUS}. In *19th USENIX*  
416 *Conference on File and Storage Technologies (FAST 21)*, pages 341–354, 2021.

417 ShareGPT Team. Sharegpt dataset. [https://huggingface.co/datasets/anon8231489123/](https://huggingface.co/datasets/anon8231489123/ShareGPT_Vicuna_unfiltered)  
418 [ShareGPT\\_Vicuna\\_unfiltered](https://huggingface.co/datasets/anon8231489123/ShareGPT_Vicuna_unfiltered), 2023. Accessed: 2025-05-12.

419 Charlie Snell, Jaehoon Lee, Kelvin Xu, and Aviral Kumar. Scaling llm test-time compute optimally  
420 can be more effective than scaling model parameters. *arXiv preprint arXiv:2408.03314*, 2024.

421 Zhenyu Song, Daniel S. Berger, Kai Li, and Wyatt Lloyd. Learning relaxed belady for content  
422 distribution network caching. In *Proceedings of the 17th USENIX Symposium on Networked*  
423 *Systems Design and Implementation (NSDI 2020)*, 2020.

424 Zhenyu Song, Kevin Chen, Nikhil Sarda, Deniz Altınbüken, Eugene Brevdo, Jimmy Coleman, Xiao  
425 Ju, Pawel Jurczyk, Richard Schooler, and Ramki Gummadi. {HALP}: Heuristic aided learned  
426 preference eviction policy for {YouTube} content delivery network. In *20th USENIX Symposium*  
427 *on Networked Systems Design and Implementation (NSDI 23)*, pages 1149–1163, 2023.

428 Yi Sun, Han Wang, Jiaqiang Li, Jiacheng Liu, Xiangyu Li, Hao Wen, Huiwen Zheng, Yan Liang,  
429 Yuanchun Li, and Yunxin Liu. Time up! an empirical study of llm reasoning ability under output  
430 length constraint. *arXiv preprint arXiv:2504.14350*, 2025.

431 Giuseppe Vietri, Liana V Rodriguez, Wendy A Martinez, Steven Lyons, Jason Liu, Raju Rangaswami,  
432 Ming Zhao, and Giri Narasimhan. Driving cache replacement with {ML-based}{LeCaR}. In *10th*  
433 *USENIX Workshop on Hot Topics in Storage and File Systems (HotStorage 18)*, 2018.

434 Liang Wang, Nan Yang, Xiaolong Huang, Linjun Yang, Rangan Majumder, and Furu Wei. Multilin-  
435 gual e5 text embeddings: A technical report. *arXiv preprint arXiv:2402.05672*, 2024.

436 Dongsheng Yang, Daniel S. Berger, Kai Li, and Wyatt Lloyd. A learned cache eviction framework  
437 with minimal overhead. *arXiv preprint arXiv:2301.11886*, 2023.

438 Jiayi Yao, Hanchen Li, Yuhan Liu, Siddhant Ray, Yihua Cheng, Qizheng Zhang, Kuntai Du, Shan Lu,  
439 and Junchen Jiang. Cacheblend: Fast large language model serving for rag with cached knowledge  
440 fusion. In *Proceedings of the Twentieth European Conference on Computer Systems*, pages 94–109,  
441 2025.

442 Lianmin Zheng, Wei-Lin Chiang, Ying Sheng, Tianle Li, Siyuan Zhuang, Zhanghao Wu, Yonghao  
443 Zhuang, Zhuohan Li, Zi Lin, Eric P Xing, et al. Lmsys-chat-1m: A large-scale real-world llm  
444 conversation dataset. *arXiv preprint arXiv:2309.11998*, 2023a.

445 Lianmin Zheng, Liangsheng Yin, Zhiqiang Xie, Chuyue Sun, Jeff Huang, Cody Hao Yu, Shiyi Cao,  
446 Christos Kozyrakis, Ion Stoica, Joseph E. Gonzalez, Clark Barrett, and Ying Sheng. Sglang:  
447 Efficient execution of structured language model programs. In *Advances in Neural Information*  
448 *Processing Systems*, volume 37, pages 62557–62583, 2024.

449 Zangwei Zheng, Xiaozhe Ren, Fuzhao Xue, Yang Luo, Xin Jiang, and Yang You. Response length  
450 perception and sequence scheduling: An llm-empowered llm inference pipeline, 2023b. URL  
451 <https://arxiv.org/abs/2305.13144>.

452 Yinmin Zhong, Shengyu Liu, Junda Chen, Jianbo Hu, Yibo Zhu, Xuanzhe Liu, Xin Jin, and Hao  
453 Zhang. {DistServe}: Disaggregating prefill and decoding for goodput-optimized large language  
454 model serving. In *18th USENIX Symposium on Operating Systems Design and Implementation*  
455 (*OSDI 24*), pages 193–210, 2024.

## A Additional Experiments

### A.1 LPC Computational Overhead

In this section, we extend Section 4.6 to address the research question on the computational overhead of our proposed method LPC.

**Metrics.** We evaluate GPU computational activity using three fine-grained metrics collected by NVIDIA Data Center GPU Manager: SM Active, SM Occupancy, and Tensor Pipe Active. SM Active indicates the proportion of cycles during which at least one warp was assigned to any Streaming Multiprocessor (SM), reflecting overall SM computational engagement. SM Occupancy measures the ratio of active resident warps to the theoretical maximum warps per SM, averaged across SMs. Tensor Pipe Active represents the ratio of cycles where any tensor pipe was active.

**Setup.** We run three configurations: our proposed LPC method, the baseline LRU method, and the LRU w/ predictor configuration. The LRU w/ predictor configuration integrates the LPC predictor with the standard LRU policy; this setup is specifically designed to measure the predictor’s intrinsic computational overhead while maintaining a cache hit ratio comparable to the baseline LRU. The experiments are conducted on the LMSys dataset with a 40 GB cache size. The chat interval parameter  $\lambda_{\text{chat}}$  is 100.

Table 2: GPU computational activity on LMSys with 40 GB cache size.

| Metric                 | LPC   | LRU   | LRU w/ predictor |
|------------------------|-------|-------|------------------|
| SM Active (%)          | 39.70 | 41.74 | 42.04            |
| SM Occupancy (%)       | 7.63  | 8.05  | 8.12             |
| Tensor Pipe Active (%) | 11.42 | 12.05 | 12.07            |
| Hit Ratio (%)          | 46.50 | 40.90 | 40.90            |

**Results.** The results in Table 2 show that LPC reduces the overall GPU computations by about 5%. Specifically, LPC achieves a 4.89% decrease in SM Active, a 5.22% decrease in SM Occupancy, and a 5.23% decrease in Tensor Pipe Active, underscoring its effectiveness in reducing the overall computational load due to its higher prefix cache hit ratio. Second, to assess the computational overhead introduced by the LPC predictor, we compared the LRU baseline with and without running an LPC predictor. The results indicate that the predictor’s overhead is minimal: SM Active increased by only 0.72%, SM Occupancy by 0.87%, and Tensor Pipe Active by a mere 0.17% when the predictor was added to LRU. This confirms that the LPC predictor can be integrated to LPC with a marginal computational overhead.

### A.2 LPC Memory Overhead Sensitivity Analysis

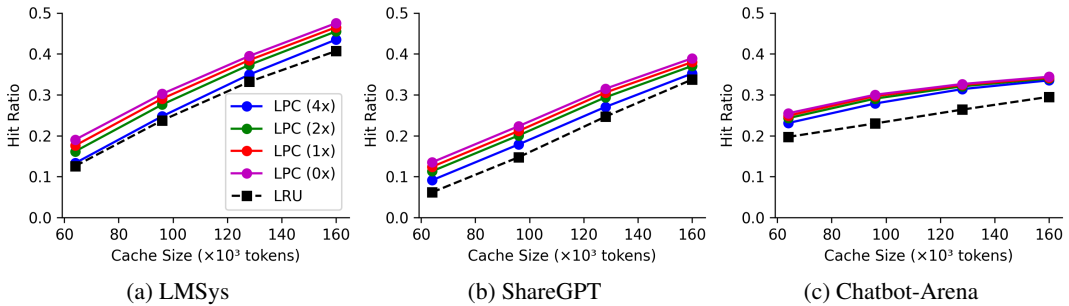

Figure 8: Sensitivity of LPC’s cache hit ratio to its internal GPU memory overhead, compared with LRU. LPC ( $N\times$ ) denotes LPC configured with  $N$  times of its actual GPU memory requirement.

To understand the impact of LPC’s internal GPU memory overhead on its performance, we conduct a sensitivity analysis. We vary the GPU memory specifically reserved for LPC’s predictor, evaluating

configurations where this reserved memory is  $0\times$ ,  $1\times$ ,  $2\times$ , and  $4\times$  times the actual GPU memory requirement for LPC’s predictor, which requires 1 GB GPU memory. Figure 8 illustrates the resulting cache hit ratios for LPC under these varying levels GPU memory overhead, compared against LRU, across three distinct datasets. The evaluation setup is the same as in Section 4.3.

The results show that the GPU memory allocated to LPC’s predictor has a 0.6% to 8.1% impact on its hit ratio. This is observed by comparing LPC ( $0\times$ ) with LPC ( $1\times$ ). The hit ratio sees a reduction ranging from 0.6% to 2.4%, at a cache size of  $16 \times 10^4$  tokens (40 GB for H100 after loading Qwen3-32B-FP8). The hit ratio impact is more pronounced at smaller cache capacities, as the reduction in hit ratio when moving from LPC ( $0\times$ ) to LPC ( $1\times$ ) ranges from 2.3% to 8.1%, at a cache size of  $6.4 \times 10^4$  tokens (16 GB). These findings indicate that though LPC’s prediction mechanism is fundamentally superior to LRU, minimizing its direct GPU memory overhead is crucial for maximizing its cache hit ratio benefits, especially when GPU memory resources are limited.

Despite the internal overhead variations, LPC consistently outperforms LRU. When varying LPC’s predictor overhead from  $0\times$  to  $4\times$ , LPC achieves 4.3% to 16.7% higher hit ratios than LRU at the cache size of  $16 \times 10^4$  tokens (40 GB). At the smaller cache size of  $6.4 \times 10^4$  tokens (16 GB), LPC achieves 5.8% to 119.0% higher hit ratios than LRU. These findings indicate that LPC’s prediction mechanism is fundamentally superior to LRU.

### A.3 LPC Predictor Accuracy and Ablation Study

To evaluate the effectiveness of LPC predictor on predicting whether the conversation will continue, we measure its binary classification metrics including Matthews Correlation Coefficient (MCC) and macro-averaged F1 score (F1 macro). The *Matthews Correlation Coefficient (MCC)* is a robust metric for binary classification when classes are imbalanced, ranging from -1 (total disagreement) to +1 (perfect prediction), with 0 indicating random performance. The *macro-averaged F1 score (F1 macro)* computes the F1 score (harmonic mean of precision and recall) independently for each class and then averages them; it ranges from 0 to 1 (best).  $\text{LPC}_{\text{turns}}$  is an ablation study using only the number of turns as the input, without the conversation text. It bins the training data by the number of turns and predicts the label as the majority of the training labels in the corresponding bin.

Table 3: Prediction correctness of LPC predictor and an ablation study using only the number of turns as the input ( $\text{LPC}_{\text{turns}}$ ). Higher values are better for all metrics.

| Dataset       | Method                      | MCC           | F1 macro      |
|---------------|-----------------------------|---------------|---------------|
| LMSys         | $\text{LPC}_{\text{turns}}$ | 0.3510        | 0.6755        |
|               | LPC                         | <b>0.3863</b> | <b>0.6923</b> |
| ShareGPT      | $\text{LPC}_{\text{turns}}$ | -0.0012       | 0.4165        |
|               | LPC                         | <b>0.2815</b> | <b>0.6407</b> |
| Chatbot-Arena | $\text{LPC}_{\text{turns}}$ | 0.0775        | 0.4741        |
|               | LPC                         | <b>0.3689</b> | <b>0.6837</b> |

The results in Table 3 indicate that the full LPC predictor achieves 0.28 to 0.36 MCC and is always superior to the  $\text{LPC}_{\text{turns}}$  ablation. This suggests that leveraging the semantic content of the conversation provides valuable signals for predicting continuation likelihood. For instance, on the Chatbot-Arena dataset, LPC shows a substantial improvement in MCC (0.3689 vs. 0.0775) and F1 macro (0.6837 vs. 0.4741) over  $\text{LPC}_{\text{turns}}$ . The negative MCC for  $\text{LPC}_{\text{turns}}$  on ShareGPT indicates that using only turn count as a predictor is no better than random guessing for that specific dataset. The LMSys dataset shows comparable MCC and F1 macro between LPC and  $\text{LPC}_{\text{turns}}$  and indicates that a light-weight predictor such as  $\text{LPC}_{\text{turns}}$  may be strong enough in some scenarios. Overall, the results show the effectiveness of our content-aware features in predicting the conversation continuation.

### A.4 Hit Ratio Comparisons with Oracle

To assess the upper bound for further potential improvements, we compare the hit ratio of LPC against an Oracle policy, which possesses perfect future knowledge of whether a conversation will continue.

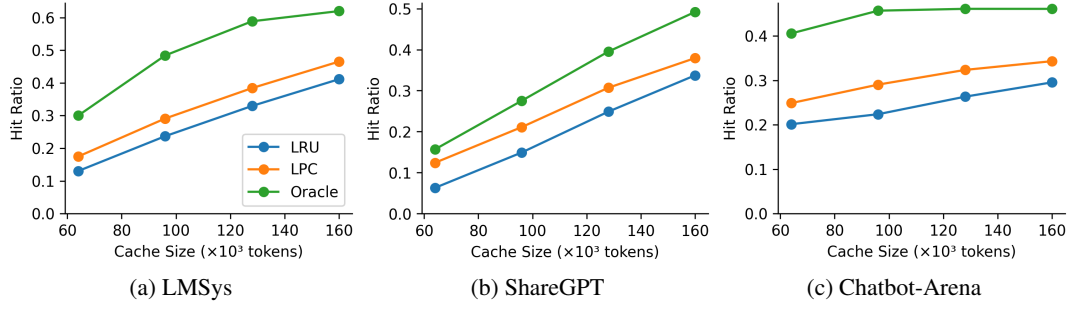

Figure 9: Hit ratio vs. cache size. LPC reduces the gap from LRU to Oracle by 22% to 66%.

Figure 9 presents this comparison alongside LRU across the three datasets for various cache sizes. The evaluation setup is the same as in Section 4.3.

The results indicate that LPC consistently reduces the hit ratio gap between LRU and Oracle. On the LMSys dataset (Figure 9a), the reduction in the gap is from 22% to 30%. On the ShareGPT dataset (Figure 9b), the reduction is from 28% to 64%. The remaining gap to Oracle is only about 0.5 times the current LPC-over-LRU gain at the smallest cache size. We hypothesize that it is because LPC has higher accuracy in high-confidence predictions, and the small cache size is only enough to hold those high-confidence prefixes. For the Chatbot-Arena dataset (Figure 9c), the reduction of the hit ratio gap from LRU to Oracle achieved by LPC ranges from 25% to 28%.

These observations highlight the substantial advancements LPC delivers in prefix caching. While a performance ceiling defined by the Oracle benchmark remains, we contend that LPC effectively captures the vast majority of predictive information available within the conversation text itself. Therefore, we believe that future efforts to substantially close the remaining gap and approach Oracle-level performance will likely need to incorporate new data dimensions, such as user access patterns, moving beyond sole reliance on textual content for prediction.

## A.5 Experiment Statistical Significance

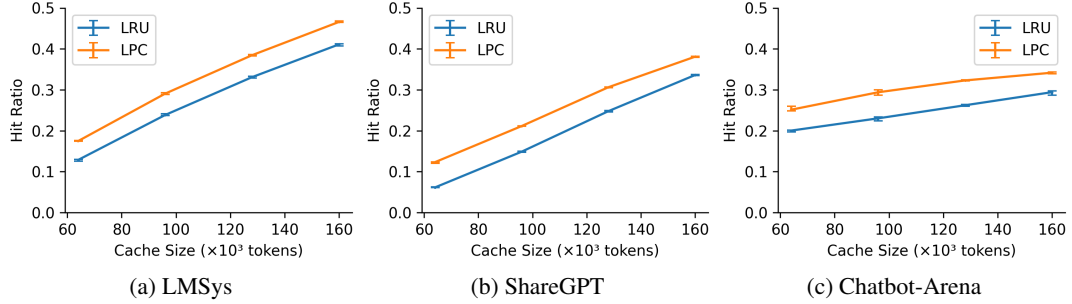

Figure 10: Hit ratio vs. cache size with error bars. The variation in the hit ratio is smaller than 0.013.

To assess the statistical significance and stability of our results, we repeated the experimental runs for at least 5 times for each data point. Figure 10 presents the hit ratios with error bars indicating the observed minimum and maximum values across these runs. The analysis of this data reveals that the variations are consistently small. Specifically, the maximum absolute difference between the highest and lowest observed hit ratio for any given configuration (algorithm, dataset, and cache size) is less than 0.013. The relative variation (max-min difference divided by the mean hit ratio) is also small, always below 4.6% and in most cases lower than 1%. This low variance across repeated experiments indicates that the performance differences observed between our proposed method and the baseline are robust and not attributable to random fluctuations, underscoring the statistical significance of our findings.

## 549 **B Additional Algorithm Description**

### 550 **B.1 Handling KV Blocks Shared by Multiple Conversations.**

A significant challenge in prefix caching arises with KV blocks shared across multiple distinct conversations, such as those resulting from common system prompts or identical initial user queries. Naive metadata management that simply overwrites the score of such blocks with the latest score can lead to suboptimal eviction decisions, because a popular prefix shared by multiple conversations would be incorrectly evicted by the most recent related conversation if it has a low score. Our algorithm incorporates specific logic for these shared blocks. The  $time_{last}$  for a shared block is always updated to its most recent access timestamp. Furthermore, when a shared block is accessed as part of a new or existing conversation, its effective continuation probability for eviction decisions is set to the maximum of its  $prob_{cur}^{block}$  calculated now from the previously stored metadata and  $prob_{cur}^{new}$  calculated from the incoming metadata. This max-pooling operation across all conversations sharing the block is represented as:

$$prob_{cur}^{block} = \max(prob_{cur}^{block}, prob_{cur}^{new})$$

551 This strategy ensures that a block shared by multiple conversations, where at least one is highly likely  
552 to continue and has been recently active, is not prematurely evicted due to association with a less  
553 likely-to-continue conversation.



## NeurIPS Paper Checklist

### 1. Claims

Question: Do the main claims made in the abstract and introduction accurately reflect the paper's contributions and scope?

Answer: [\[Yes\]](#)

Justification: The abstract and introduction accurately state LPC's contributions (e.g., first learned LLM prefix eviction using conversational analysis) and key performance results (e.g., 18–47% cache size reduction, 11% prefilling throughput improvement), which are detailed and supported in Sections 3 and 4.

Guidelines:

- The answer NA means that the abstract and introduction do not include the claims made in the paper.
- The abstract and/or introduction should clearly state the claims made, including the contributions made in the paper and important assumptions and limitations. A No or NA answer to this question will not be perceived well by the reviewers.
- The claims made should match theoretical and experimental results, and reflect how much the results can be expected to generalize to other settings.
- It is fine to include aspirational goals as motivation as long as it is clear that these goals are not attained by the paper.

### 2. Limitations

Question: Does the paper discuss the limitations of the work performed by the authors?

Answer: [\[Yes\]](#)

Justification: Section 6 explicitly discusses limitations, including reliance on synthetic timestamps for evaluation, comparison primarily against LRU, and the use of a single lightweight prediction model architecture.

Guidelines:

- The answer NA means that the paper has no limitation while the answer No means that the paper has limitations, but those are not discussed in the paper.
- The authors are encouraged to create a separate "Limitations" section in their paper.
- The paper should point out any strong assumptions and how robust the results are to violations of these assumptions (e.g., independence assumptions, noiseless settings, model well-specification, asymptotic approximations only holding locally). The authors should reflect on how these assumptions might be violated in practice and what the implications would be.
- The authors should reflect on the scope of the claims made, e.g., if the approach was only tested on a few datasets or with a few runs. In general, empirical results often depend on implicit assumptions, which should be articulated.
- The authors should reflect on the factors that influence the performance of the approach. For example, a facial recognition algorithm may perform poorly when image resolution is low or images are taken in low lighting. Or a speech-to-text system might not be used reliably to provide closed captions for online lectures because it fails to handle technical jargon.
- The authors should discuss the computational efficiency of the proposed algorithms and how they scale with dataset size.
- If applicable, the authors should discuss possible limitations of their approach to address problems of privacy and fairness.
- While the authors might fear that complete honesty about limitations might be used by reviewers as grounds for rejection, a worse outcome might be that reviewers discover limitations that aren't acknowledged in the paper. The authors should use their best judgment and recognize that individual actions in favor of transparency play an important role in developing norms that preserve the integrity of the community. Reviewers will be specifically instructed to not penalize honesty concerning limitations.

### 3. Theory assumptions and proofs

Question: For each theoretical result, does the paper provide the full set of assumptions and a complete (and correct) proof?

Answer: [NA]

Justification: The paper proposes an empirical method and evaluates it experimentally. It does not introduce new theoretical results that require formal proofs.

Guidelines:

- The answer NA means that the paper does not include theoretical results.
- All the theorems, formulas, and proofs in the paper should be numbered and cross-referenced.
- All assumptions should be clearly stated or referenced in the statement of any theorems.
- The proofs can either appear in the main paper or the supplemental material, but if they appear in the supplemental material, the authors are encouraged to provide a short proof sketch to provide intuition.
- Inversely, any informal proof provided in the core of the paper should be complemented by formal proofs provided in appendix or supplemental material.
- Theorems and Lemmas that the proof relies upon should be properly referenced.

#### 4. Experimental result reproducibility

Question: Does the paper fully disclose all the information needed to reproduce the main experimental results of the paper to the extent that it affects the main claims and/or conclusions of the paper (regardless of whether the code and data are provided or not)?

Answer: [Yes]

Justification: Key details for reproducibility are provided, including implementation environment and hardware (Section 4.1), models used (Section 3.2, 4.1), datasets (Section 4.2), synthetic timestamp generation (Section 4.2), predictor architecture and training parameters (Section 3.2, 3.3).

Guidelines:

- The answer NA means that the paper does not include experiments.
- If the paper includes experiments, a No answer to this question will not be perceived well by the reviewers: Making the paper reproducible is important, regardless of whether the code and data are provided or not.
- If the contribution is a dataset and/or model, the authors should describe the steps taken to make their results reproducible or verifiable.
- Depending on the contribution, reproducibility can be accomplished in various ways. For example, if the contribution is a novel architecture, describing the architecture fully might suffice, or if the contribution is a specific model and empirical evaluation, it may be necessary to either make it possible for others to replicate the model with the same dataset, or provide access to the model. In general, releasing code and data is often one good way to accomplish this, but reproducibility can also be provided via detailed instructions for how to replicate the results, access to a hosted model (e.g., in the case of a large language model), releasing of a model checkpoint, or other means that are appropriate to the research performed.
- While NeurIPS does not require releasing code, the conference does require all submissions to provide some reasonable avenue for reproducibility, which may depend on the nature of the contribution. For example
  - (a) If the contribution is primarily a new algorithm, the paper should make it clear how to reproduce that algorithm.
  - (b) If the contribution is primarily a new model architecture, the paper should describe the architecture clearly and fully.
  - (c) If the contribution is a new model (e.g., a large language model), then there should either be a way to access this model for reproducing the results or a way to reproduce the model (e.g., with an open-source dataset or instructions for how to construct the dataset).

659 (d) We recognize that reproducibility may be tricky in some cases, in which case  
660 authors are welcome to describe the particular way they provide for reproducibility.  
661 In the case of closed-source models, it may be that access to the model is limited in  
662 some way (e.g., to registered users), but it should be possible for other researchers  
663 to have some path to reproducing or verifying the results.

## 664 5. Open access to data and code

665 Question: Does the paper provide open access to the data and code, with sufficient instruc-  
666 tions to faithfully reproduce the main experimental results, as described in supplemental  
667 material?

668 Answer: [Yes]

669 Justification: The datasets used are publicly available (LMSys, ShareGPT, Chatbot Arena),  
670 as cited in Section 4.2. The code and instructions to reproduce the main experimental results  
671 is included in the supplementary material.

672 Guidelines:

- 673 • The answer NA means that paper does not include experiments requiring code.
- 674 • Please see the NeurIPS code and data submission guidelines ([https://nips.cc/](https://nips.cc/public/guides/CodeSubmissionPolicy)  
675 [public/guides/CodeSubmissionPolicy](https://nips.cc/public/guides/CodeSubmissionPolicy)) for more details.
- 676 • While we encourage the release of code and data, we understand that this might not be  
677 possible, so “No” is an acceptable answer. Papers cannot be rejected simply for not  
678 including code, unless this is central to the contribution (e.g., for a new open-source  
679 benchmark).
- 680 • The instructions should contain the exact command and environment needed to run to  
681 reproduce the results. See the NeurIPS code and data submission guidelines ([https://](https://nips.cc/public/guides/CodeSubmissionPolicy)  
682 [nips.cc/public/guides/CodeSubmissionPolicy](https://nips.cc/public/guides/CodeSubmissionPolicy)) for more details.
- 683 • The authors should provide instructions on data access and preparation, including how  
684 to access the raw data, preprocessed data, intermediate data, and generated data, etc.
- 685 • The authors should provide scripts to reproduce all experimental results for the new  
686 proposed method and baselines. If only a subset of experiments are reproducible, they  
687 should state which ones are omitted from the script and why.
- 688 • At submission time, to preserve anonymity, the authors should release anonymized  
689 versions (if applicable).
- 690 • Providing as much information as possible in supplemental material (appended to the  
691 paper) is recommended, but including URLs to data and code is permitted.

## 692 6. Experimental setting/details

693 Question: Does the paper specify all the training and test details (e.g., data splits, hyper-  
694 parameters, how they were chosen, type of optimizer, etc.) necessary to understand the  
695 results?

696 Answer: [Yes]

697 Justification: Key training details (data splits, predictor hyperparameters in Section 3.3;  
698 embedding model specifics in Section 3.2) and test settings (evaluation setup including  $\lambda_{\text{chat}}$ ,  
699  $N_{\text{conv}}$  in Section 4.1, 4.2; decay scale tuning in Section 3.4.2) are provided.

700 Guidelines:

- 701 • The answer NA means that the paper does not include experiments.
- 702 • The experimental setting should be presented in the core of the paper to a level of detail  
703 that is necessary to appreciate the results and make sense of them.
- 704 • The full details can be provided either with the code, in appendix, or as supplemental  
705 material.

## 706 7. Experiment statistical significance

707 Question: Does the paper report error bars suitably and correctly defined or other appropriate  
708 information about the statistical significance of the experiments?

709 Answer: [Yes]

710 Justification: The plot with error bar is included in the Appendix.

Guidelines:

- The answer NA means that the paper does not include experiments.
- The authors should answer "Yes" if the results are accompanied by error bars, confidence intervals, or statistical significance tests, at least for the experiments that support the main claims of the paper.
- The factors of variability that the error bars are capturing should be clearly stated (for example, train/test split, initialization, random drawing of some parameter, or overall run with given experimental conditions).
- The method for calculating the error bars should be explained (closed form formula, call to a library function, bootstrap, etc.)
- The assumptions made should be given (e.g., Normally distributed errors).
- It should be clear whether the error bar is the standard deviation or the standard error of the mean.
- It is OK to report 1-sigma error bars, but one should state it. The authors should preferably report a 2-sigma error bar than state that they have a 96% CI, if the hypothesis of Normality of errors is not verified.
- For asymmetric distributions, the authors should be careful not to show in tables or figures symmetric error bars that would yield results that are out of range (e.g. negative error rates).
- If error bars are reported in tables or plots, The authors should explain in the text how they were calculated and reference the corresponding figures or tables in the text.

## 8. Experiments compute resources

Question: For each experiment, does the paper provide sufficient information on the computer resources (type of compute workers, memory, time of execution) needed to reproduce the experiments?

Answer: [Yes]

Justification: Section 4.1 specifies the use of NVIDIA H100 GPUs with 80GB HBM3 memory, a single GPU for the model, 8 CPUs, and 64GB CPU memory. Section 3.3 mentions predictor training takes about 10 minutes. Section 4.2 mentions evaluations run for 20 minutes. Section 4.1 details GPU memory allocation for the predictor (1GB total). This provides a good overview of resources for reported runs.

Guidelines:

- The answer NA means that the paper does not include experiments.
- The paper should indicate the type of compute workers CPU or GPU, internal cluster, or cloud provider, including relevant memory and storage.
- The paper should provide the amount of compute required for each of the individual experimental runs as well as estimate the total compute.
- The paper should disclose whether the full research project required more compute than the experiments reported in the paper (e.g., preliminary or failed experiments that didn't make it into the paper).

## 9. Code of ethics

Question: Does the research conducted in the paper conform, in every respect, with the NeurIPS Code of Ethics <https://neurips.cc/public/EthicsGuidelines>?

Answer: [Yes]

Justification: We conduct research conforming to the Code of Ethics.

Guidelines:

- The answer NA means that the authors have not reviewed the NeurIPS Code of Ethics.
- If the authors answer No, they should explain the special circumstances that require a deviation from the Code of Ethics.
- The authors should make sure to preserve anonymity (e.g., if there is a special consideration due to laws or regulations in their jurisdiction).

## 10. Broader impacts

Question: Does the paper discuss both potential positive societal impacts and negative societal impacts of the work performed?

Answer: [NA]

Justification: The research focuses on improving the computational efficiency of LLM inference systems using publicly available conversational datasets. It does not have potential negative societal impacts.

Guidelines:

- The answer NA means that there is no societal impact of the work performed.
- If the authors answer NA or No, they should explain why their work has no societal impact or why the paper does not address societal impact.
- Examples of negative societal impacts include potential malicious or unintended uses (e.g., disinformation, generating fake profiles, surveillance), fairness considerations (e.g., deployment of technologies that could make decisions that unfairly impact specific groups), privacy considerations, and security considerations.
- The conference expects that many papers will be foundational research and not tied to particular applications, let alone deployments. However, if there is a direct path to any negative applications, the authors should point it out. For example, it is legitimate to point out that an improvement in the quality of generative models could be used to generate deepfakes for disinformation. On the other hand, it is not needed to point out that a generic algorithm for optimizing neural networks could enable people to train models that generate Deepfakes faster.
- The authors should consider possible harms that could arise when the technology is being used as intended and functioning correctly, harms that could arise when the technology is being used as intended but gives incorrect results, and harms following from (intentional or unintentional) misuse of the technology.
- If there are negative societal impacts, the authors could also discuss possible mitigation strategies (e.g., gated release of models, providing defenses in addition to attacks, mechanisms for monitoring misuse, mechanisms to monitor how a system learns from feedback over time, improving the efficiency and accessibility of ML).

## 11. Safeguards

Question: Does the paper describe safeguards that have been put in place for responsible release of data or models that have a high risk for misuse (e.g., pretrained language models, image generators, or scraped datasets)?

Answer: [NA]

Justification: The paper does not release models or datasets that would pose a high risk for misuse.

Guidelines:

- The answer NA means that the paper poses no such risks.
- Released models that have a high risk for misuse or dual-use should be released with necessary safeguards to allow for controlled use of the model, for example by requiring that users adhere to usage guidelines or restrictions to access the model or implementing safety filters.
- Datasets that have been scraped from the Internet could pose safety risks. The authors should describe how they avoided releasing unsafe images.
- We recognize that providing effective safeguards is challenging, and many papers do not require this, but we encourage authors to take this into account and make a best faith effort.

## 12. Licenses for existing assets

Question: Are the creators or original owners of assets (e.g., code, data, models), used in the paper, properly credited and are the license and terms of use explicitly mentioned and properly respected?

Answer: [Yes]

Justification: The paper properly cites the original papers for the datasets (LMSys, ShareGPT, Chatbot Arena in Section 4.2) and models/frameworks used (vLLM in 4.1, multilingual-e5-small in 3.2, Qwen3 in 4.1). The specific licenses (e.g., Apache-2.0, MIT, CC) and terms of use for these existing assets are explicitly stated in the paper.

Guidelines:

- The answer NA means that the paper does not use existing assets.
- The authors should cite the original paper that produced the code package or dataset.
- The authors should state which version of the asset is used and, if possible, include a URL.
- The name of the license (e.g., CC-BY 4.0) should be included for each asset.
- For scraped data from a particular source (e.g., website), the copyright and terms of service of that source should be provided.
- If assets are released, the license, copyright information, and terms of use in the package should be provided. For popular datasets, [paperswithcode.com/datasets](https://paperswithcode.com/datasets) has curated licenses for some datasets. Their licensing guide can help determine the license of a dataset.
- For existing datasets that are re-packaged, both the original license and the license of the derived asset (if it has changed) should be provided.
- If this information is not available online, the authors are encouraged to reach out to the asset’s creators.

### 13. New assets

Question: Are new assets introduced in the paper well documented and is the documentation provided alongside the assets?

Answer: [NA]

Justification: The paper does not release a new asset.

Guidelines:

- The answer NA means that the paper does not release new assets.
- Researchers should communicate the details of the dataset/code/model as part of their submissions via structured templates. This includes details about training, license, limitations, etc.
- The paper should discuss whether and how consent was obtained from people whose asset is used.
- At submission time, remember to anonymize your assets (if applicable). You can either create an anonymized URL or include an anonymized zip file.

### 14. Crowdsourcing and research with human subjects

Question: For crowdsourcing experiments and research with human subjects, does the paper include the full text of instructions given to participants and screenshots, if applicable, as well as details about compensation (if any)?

Answer: [NA]

Justification: The paper uses existing publicly available datasets (LMSys, ShareGPT, Chatbot Arena) which consist of prior human-chatbot interactions. The research described does not involve conducting new crowdsourcing experiments or new direct research with human subjects.

Guidelines:

- The answer NA means that the paper does not involve crowdsourcing nor research with human subjects.
- Including this information in the supplemental material is fine, but if the main contribution of the paper involves human subjects, then as much detail as possible should be included in the main paper.
- According to the NeurIPS Code of Ethics, workers involved in data collection, curation, or other labor should be paid at least the minimum wage in the country of the data collector.

867 **15. Institutional review board (IRB) approvals or equivalent for research with human**  
868 **subjects**

869 Question: Does the paper describe potential risks incurred by study participants, whether  
870 such risks were disclosed to the subjects, and whether Institutional Review Board (IRB)  
871 approvals (or an equivalent approval/review based on the requirements of your country or  
872 institution) were obtained?

873 Answer: [NA]

874 Justification: The research uses existing datasets and does not involve new interactions with  
875 human subjects. Therefore, IRB approval for the work presented in this paper itself is not  
876 applicable. Ethical considerations related to the original dataset collection would have been  
877 the responsibility of the original dataset creators.

878 Guidelines:

- 879 • The answer NA means that the paper does not involve crowdsourcing nor research with  
880 human subjects.
- 881 • Depending on the country in which research is conducted, IRB approval (or equivalent)  
882 may be required for any human subjects research. If you obtained IRB approval, you  
883 should clearly state this in the paper.
- 884 • We recognize that the procedures for this may vary significantly between institutions  
885 and locations, and we expect authors to adhere to the NeurIPS Code of Ethics and the  
886 guidelines for their institution.
- 887 • For initial submissions, do not include any information that would break anonymity (if  
888 applicable), such as the institution conducting the review.

889 **16. Declaration of LLM usage**

890 Question: Does the paper describe the usage of LLMs if it is an important, original, or  
891 non-standard component of the core methods in this research? Note that if the LLM is used  
892 only for writing, editing, or formatting purposes and does not impact the core methodology,  
893 scientific rigor, or originality of the research, declaration is not required.

894 Answer: [NA]

895 Justification: LLMs were not used in developing or implementing the core methods. The  
896 algorithm itself uses a text embedding model to embed the input but it is not an LLM.

897 Guidelines:

- 898 • The answer NA means that the core method development in this research does not  
899 involve LLMs as any important, original, or non-standard components.
- 900 • Please refer to our LLM policy (<https://neurips.cc/Conferences/2025/LLM>)  
901 for what should or should not be described.
